# Supplementary material for: Acute renal injury after aortic arch reconstruction with cardiopulmonary bypass for children: prediction models by machine learning of a retrospective cohort study
Source: Eur J Med Res. 2023 Nov 8;28:499. doi: 10.1186/s40001-023-01455-2 (PMC10631067; doi:10.1186/s40001-023-01455-2)
Supplement: Supplementary file 12 — Additional file 12. Raw data. [file 40001_2023_1455_MOESM12_ESM.xlsx]

## Sheet: Sheet1
Final	Newborn	Gender	Weight	eGFR	Premature	Cyanosis	RACHS	CPB.strategy	PDA	PAH	Preoperative.diuretics	Vasoactive.drugs	Surgery	CPB	ACCT	Renal.ischemia		PSM	Final	Newborn	Weight	eGFR	Cyanosis	CPBstrategy	PDA	Renalischemia
0	1	1	11	193.67	0	0	5	0	1	2	0	0	150	64	41	24			0	1	11	193.67	0	0	1	24
0	1	0	18	189.619	0	0	5	1	1	1	0	1	160	88	71	38			0	1	4	79.1875	0	1	1	24
0	1	0	10.5	182.905	0	0	4	0	1	1	0	0	153	83	39	30			0	1	10.5	182.905	0	0	1	30
0	1	0	4.5	178.215	0	0	3	0	1	4	1	1	154	88	47	27			0	1	3.5	67.5733	1	1	1	25
0	1	0	4.2	176.917	0	1	3	1	1	4	0	0	186	112	68	27			0	1	4.5	178.215	0	0	1	27
0	0	1	18.5	176.475	1	0	5	0	1	1	0	0	180	66	42	24			0	1	4.5	114.03	0	1	1	26
0	0	0	3.48	173.908	0	1	3	1	1	4	0	1	203	76	47	27			0	0	18.5	176.475	0	0	1	24
0	1	1	3.5	170.353	0	1	3	1	1	3	0	0	256	142	83	25			1	1	2.5	52.1131	1	1	1	33
0	0	1	7.5	168.933	0	1	4	1	1	4	1	1	180	63	45	26			1	0	4	151.382	0	0	1	40
0	1	1	14.5	164.545	1	0	5	1	0	1	0	0	133	74	56	31			1	1	3.4	50.68	0	1	0	37
0	0	0	3.8	159.127	0	1	4	1	1	3	0	0	190	103	64	35			0	1	4.1	151.188	0	0	1	33
0	0	0	44	152.587	0	0	5	1	0	2	0	0	105	63	50	26			1	1	6	108.6	0	1	1	30
1	0	1	4	151.382	0	0	3	0	1	4	0	0	193	121	75	40			0	0	4.68	145.715	0	0	1	34
0	1	1	4.1	151.188	0	0	3	0	1	4	0	0	170	115	61	33			1	1	3.5	83.1259	1	1	1	37
0	0	1	4.68	145.715	0	0	3	0	1	4	0	0	163	116	63	34			0	1	6	144.8	1	0	0	24
0	1	1	6	144.8	0	1	3	0	0	3	0	0	160	86	42	24			1	1	6	115.495	0	1	0	27
0	0	0	3.9	143.224	0	1	3	0	1	1	0	0	160	98	43	25			0	0	3.9	143.224	1	0	1	25
0	1	1	7	140.564	0	1	3	1	0	1	0	0	133	62	41	27			1	1	5	87.4833	1	1	1	32
0	0	1	4.21	134.04	0	0	3	1	0	4	0	0	158	96	44	30			1	1	6	133.488	1	0	1	41
1	1	0	6	133.488	0	1	3	0	1	3	1	1	103	100	77	41			1	1	4.5	90.5	1	1	1	40
0	1	0	14	133.149	0	1	5	0	1	2	0	0	200	110	67	36			0	1	14	133.149	1	0	1	36
0	1	1	10	129.286	0	0	5	1	1	1	0	0	173	90	43	25			1	1	9.5	36.7157	1	1	0	26
0	1	1	4	129.154	0	1	3	0	1	3	0	0	153	83	51	28			0	1	4	129.154	1	0	1	28
0	1	0	6.5	125.838	0	1	3	0	1	3	1	1	160	93	43	25			1	1	2.38	38.3939	1	1	1	26
0	1	0	6.5	124.954	0	0	3	1	1	1	0	0	196	84	47	27			0	1	6.5	125.838	1	0	1	25
1	1	1	7	124.541	0	1	3	0	1	4	1	0	216	131	64	35			0	1	10	103.429	0	1	1	27
1	1	1	6.5	120.118	0	0	3	1	0	4	1	0	216	154	85	45			1	1	7	124.541	1	0	1	35
1	1	0	11	115.578	1	1	5	1	0	3	0	0	240	126	62	34			0	1	7	140.564	1	1	0	27
1	1	0	6	115.495	0	0	3	1	0	1	0	0	133	65	47	27			0	1	4.5	115.388	0	0	1	26
0	1	1	4.5	115.388	0	0	3	0	1	3	0	0	226	105	66	26			0	1	3.5	170.353	1	1	1	25
0	1	1	6.5	115.182	0	0	4	0	1	4	0	0	146	75	44	25			0	1	6.5	115.182	0	0	1	25
1	1	1	5	114.633	0	0	3	0	0	4	0	0	160	108	50	28			0	1	7	103.429	0	1	1	25
0	1	1	8.5	114.633	0	0	5	0	1	3	0	0	153	90	57	31			1	1	5	114.633	0	0	0	28
0	1	1	4.5	114.03	0	0	3	1	1	4	0	0	153	93	45	26			0	0	3.48	173.908	1	1	1	27
0	1	1	6	113.869	0	1	3	0	0	4	1	0	140	72	47	27			0	1	8.5	114.633	0	0	1	31
1	1	1	7.5	113.771	0	1	3	0	0	1	0	0	156	91	63	34			0	1	3.5	105.152	0	1	1	34
0	1	1	12	112.988	0	0	5	0	1	1	0	0	146	88	45	26			0	1	6	113.869	1	0	0	27
1	1	1	11.2	110.41	0	1	5	0	1	4	0	1	144	94	50	28			1	1	5.5	81.1379	1	1	0	26
0	1	0	6	110.245	0	0	3	1	1	4	0	0	173	105	70	38			1	1	7.5	113.771	1	0	0	34
1	1	0	8	108.872	0	0	5	0	1	2	0	0	206	98	55	30			0	0	3.74	30.0644	0	1	1	37
1	1	1	6	108.6	0	0	3	1	1	4	1	0	146	84	45	30			0	1	12	112.988	0	0	1	26
1	1	0	5.5	108.291	0	0	3	1	0	4	0	0	203	135	83	44			0	1	6.2	72.4	0	1	1	27
1	1	1	6	107.152	0	0	4	1	1	4	0	0	176	102	72	39			1	1	11.2	110.41	1	0	1	28
1	1	1	5	106.876	0	1	3	0	1	2	0	0	186	89	56	31			1	1	4.5	79.3615	1	1	1	30
0	1	1	6	105.309	0	0	4	0	1	4	0	0	153	105	53	30			1	1	8	108.872	0	0	1	30
0	1	0	3.5	105.152	0	0	5	1	1	3	0	0	150	104	62	34			0	1	4.9	85.975	0	1	1	31
0	1	1	7	104.423	0	0	4	0	1	4	0	0	150	92	45	26			1	1	5	106.876	1	0	1	31
0	1	1	10	103.429	0	0	5	1	1	1	0	0	106	71	41	27			1	1	5	94.8095	1	1	1	30
0	1	1	7	103.429	0	0	3	1	1	4	0	0	126	62	43	25			0	1	6	105.309	0	0	1	30
1	1	0	5.5	102.567	0	0	3	0	1	1	0	0	136	93	61	39			0	1	4.5	79.9925	0	1	1	28
1	1	1	3.27	101.36	0	0	3	1	1	4	0	0	213	142	49	28			0	1	7	104.423	0	0	1	26
0	0	1	7.5	100.979	0	0	4	1	1	4	1	0	146	80	40	23			1	1	3.27	101.36	0	1	1	28
0	1	0	5.5	96.0087	0	0	3	0	0	2	0	0	142	73	38	22			1	1	5.5	102.567	0	0	1	39
1	1	1	4	95.4364	0	1	3	1	0	4	0	0	276	153	104	54			1	1	6	107.152	0	1	1	39
1	1	0	3.3	95.4364	0	0	3	0	1	4	0	1	180	98	52	29			0	1	5.5	96.0087	0	0	0	22
1	1	1	5	94.8095	0	1	3	1	1	4	1	1	183	98	54	30			0	1	5.5	47.6886	0	1	1	31
0	0	0	20	92.9682	0	0	3	1	1	4	0	0	190	112	69	37			1	1	3.3	95.4364	0	0	1	29
1	1	0	13	90.5	1	0	5	0	0	2	0	0	172	100	63	34			0	1	4.2	176.917	1	1	1	27
1	1	0	3	90.5	0	1	3	0	0	4	0	0	192	112	52	29			1	1	13	90.5	0	0	0	34
1	1	1	4.5	90.5	0	1	3	1	1	4	0	0	220	148	74	40			1	0	4.5	36.5712	0	1	0	27
1	1	1	4.5	89.713	0	1	3	0	0	2	0	0	176	108	42	24			1	1	3	90.5	1	0	0	29
1	0	1	4	88.2375	1	0	3	1	1	4	0	0	233	148	108	62			1	1	3.5	75.3066	0	1	1	41
1	1	0	13.6	87.5806	0	0	5	0	1	3	0	0	183	110	54	30			1	1	4.5	89.713	1	0	0	24
1	1	1	5	87.4833	0	1	3	1	1	3	0	0	266	168	59	32			0	0	5.4	71.0077	1	1	1	23
1	1	1	2.87	86.5914	0	1	3	0	1	4	1	0	220	103	57	32			1	1	13.6	87.5806	0	0	1	30
0	1	0	4.9	85.975	0	0	3	1	1	4	0	1	206	145	57	31			0	0	7.5	100.979	0	1	1	23
1	1	1	4.3	85.004	0	1	3	1	1	4	1	0	178	107	67	41			1	1	2.87	86.5914	1	0	1	32
1	0	1	3.76	84.9913	1	1	3	1	1	4	0	1	193	121	78	41			0	1	10.5	62.8176	0	1	0	25
1	1	1	6	84.4667	0	0	3	1	0	4	1	0	173	100	76	40			1	1	4	83.5385	0	0	0	29
1	1	0	4	83.5385	0	0	3	0	0	4	0	0	226	86	52	29			0	1	6	110.245	0	1	1	38
1	1	1	3.5	83.1259	1	1	3	1	1	4	1	0	206	105	69	37			0	1	6	78.4333	0	0	1	50
1	1	1	5.5	81.1379	0	1	3	1	0	2	0	0	146	87	46	26			0	0	5.7	45.9838	0	1	1	40
1	1	1	4	81.088	0	1	3	1	1	4	0	0	193	123	69	37			0	1	5	76.1448	0	0	1	30
0	1	1	5	80.7897	0	0	3	1	1	4	0	0	140	68	45	26			0	1	6.5	124.954	0	1	1	27
0	1	1	4.5	79.9925	0	0	3	1	1	1	0	0	160	113	50	28			0	0	6.9	75.4809	0	0	1	22
1	1	1	4.5	79.3615	0	1	3	1	1	4	1	0	176	88	53	30			0	0	7.5	168.933	1	1	1	26
0	1	1	4	79.1875	0	0	3	1	1	4	1	0	160	70	42	24			1	1	3.5	74.9857	0	0	1	41
0	1	1	6	78.4333	0	0	4	0	1	4	0	0	226	150	97	50			1	1	4	81.088	1	1	1	37
0	1	1	5	76.1448	0	0	3	0	1	1	1	0	157	98	54	30			0	1	3.5	74.223	0	0	1	23
0	0	0	6.9	75.4809	0	0	4	0	1	4	0	0	170	73	38	22			0	1	10	129.286	0	1	1	25
1	1	0	3.5	75.3066	0	0	3	1	1	4	0	0	193	117	77	41			0	1	4.5	73.6067	0	0	1	43
1	1	1	3.5	74.9857	0	0	3	0	1	3	0	0	146	94	77	41			1	0	5	49.8673	1	1	1	28
0	1	1	3.5	74.223	1	0	3	0	1	4	0	0	203	106	39	23			0	1	4.5	72.9209	0	0	1	17
0	1	0	4.5	73.6067	0	0	3	0	1	4	1	0	193	137	82	43			0	1	5	80.7897	0	1	1	26
0	1	1	4.5	72.9209	0	0	3	0	1	4	0	0	112	68	47	17			1	1	4.4	72.4	1	0	1	33
1	0	1	3.4	72.4	0	1	3	1	1	4	0	0	173	118	81	43			0	1	18	189.619	0	1	1	38
1	1	1	4.4	72.4	0	1	3	0	1	4	0	0	160	93	60	33			0	1	6.15	71.27	0	0	1	24
0	1	1	6.2	72.4	0	0	3	1	1	3	1	1	210	117	53	27			1	1	4.2	69.3728	1	1	1	37
0	1	1	6.15	71.27	0	0	3	0	1	1	0	0	96	67	38	24			1	1	4	71.0836	1	0	1	30
1	1	0	4	71.0836	0	1	3	0	1	4	0	0	190	116	74	30			0	1	14.5	164.545	0	1	0	31
0	0	0	5.4	71.0077	0	1	3	1	1	4	0	0	141	77	39	23			0	1	10.5	68.5444	0	0	1	28
1	1	1	4.2	69.3728	0	1	3	1	1	4	0	0	173	109	68	37			0	0	3.69	46.056	0	1	1	32
0	1	0	10.5	68.5444	0	0	3	0	1	4	1	0	200	123	50	28			1	0	4.5	67.2286	1	0	1	28
1	0	0	3	68.3778	1	0	3	1	1	3	1	0	240	150	72	39			1	1	4.3	85.004	1	1	1	41
0	1	1	3.5	67.5733	0	1	4	1	1	4	0	0	143	84	43	25			0	1	5	65.1833	0	0	1	31
1	0	1	4.5	67.2286	0	1	3	0	1	4	0	0	146	86	49	28			0	0	3.8	159.127	1	1	1	35
0	1	1	5	65.1833	1	0	5	0	1	3	0	1	130	68	45	31			1	0	2.31	64.3556	1	0	1	34
1	0	1	2.31	64.3556	0	1	3	0	1	4	0	0	200	126	62	34			0	0	10.5	46.336	1	1	1	28
1	0	1	4	63.9533	0	0	3	0	1	4	1	0	176	106	71	38			1	0	4	63.9533	0	0	1	38
1	1	0	5.5	63.22	0	0	3	1	0	4	0	0	276	215	85	59			1	0	3	68.3778	0	1	1	39
1	1	0	7	63.15	0	0	3	1	0	4	0	0	226	144	93	48			0	0	3.64	58.3871	1	0	1	30
0	1	1	10.5	62.8176	0	0	3	1	0	4	0	0	194	127	43	25			0	0	4.21	134.04	0	1	0	30
1	0	1	3.73	61.8903	1	1	3	1	1	4	0	0	163	92	67	36			1	1	6	55.6923	1	0	0	27
0	1	0	35	60.75	0	0	5	1	0	1	0	0	126	68	44	31			1	0	3.5	40.4093	1	1	1	31
1	0	1	4.5	59.1267	0	0	3	1	1	3	0	0	160	104	75	40			1	0	3.11	54.3	1	0	1	39
0	0	1	3.64	58.3871	0	1	3	0	1	4	0	0	140	74	39	30			1	1	6.5	120.118	0	1	0	45
1	1	1	6	55.6923	0	1	3	0	0	4	1	0	166	78	59	27			0	1	11.5	48.799	0	0	1	29
1	0	1	3.11	54.3	0	1	3	0	1	4	1	0	181	102	73	39			1	0	3.17	50.4426	0	1	1	36
1	1	1	2.5	52.1131	1	1	4	1	1	4	0	0	196	137	61	33			0	0	6.5	44.1463	0	0	1	35
1	1	1	3.4	50.68	0	0	3	1	0	4	0	0	148	103	68	37			0	0	5.5	39.2235	1	1	1	30
1	0	1	3.17	50.4426	1	0	3	1	1	3	0	0	160	91	49	36			0	0	5.5	43.5367	0	0	1	40
1	0	1	3.8	50.1073	0	0	3	1	1	4	0	0	193	128	65	45			1	1	5.5	108.291	0	1	0	44
1	0	1	5	49.8673	0	1	3	1	1	4	0	1	162	106	50	28			1	1	2.82	42.6887	0	0	1	39
0	1	0	11.5	48.799	0	0	3	0	1	4	1	0	254	152	52	29			1	0	4.18	42.7818	1	1	1	34
0	1	1	5.5	47.6886	0	0	3	1	1	4	0	0	213	128	56	31			1	0	3.81	39.9505	1	0	1	32
0	0	1	10.5	46.336	0	1	3	1	1	4	1	1	105	69	38	28			1	1	11	115.578	1	1	0	34
0	0	1	3.69	46.056	0	0	3	1	1	4	0	0	169	94	57	32			1	1	3.5	39.5197	1	0	0	29
0	0	0	5.7	45.9838	0	0	3	1	1	4	1	0	180	102	76	40			1	1	6	84.4667	0	1	0	40
0	0	0	6.5	44.1463	0	0	4	0	1	4	0	0	156	95	65	35			1	1	6	37.7505	0	0	1	25
0	0	1	5.5	43.5367	1	0	3	0	1	4	0	0	202	126	76	40			1	0	3.73	61.8903	1	1	1	36
1	0	1	4.18	42.7818	0	1	3	1	1	1	1	1	186	123	63	34			1	1	2.85	31.9525	0	0	1	30
1	1	1	2.82	42.6887	1	0	3	0	1	3	0	1	205	102	62	39			1	0	4.5	59.1267	0	1	1	40
1	0	1	3.5	40.4093	0	1	3	1	1	4	0	1	280	166	57	31			0	0	5.8	30.3214	0	0	1	22
1	0	1	3.81	39.9505	0	1	3	0	1	4	0	0	206	134	59	32			1	1	7.5	39.8939	0	1	0	42
1	1	0	7.5	39.8939	0	0	3	1	0	4	0	1	236	126	60	42
1	1	0	3.5	39.5197	0	1	3	0	0	1	0	1	180	116	53	29
0	0	1	5.5	39.2235	0	1	3	1	1	4	0	1	186	113	55	30
1	1	1	2.38	38.3939	1	1	3	1	1	3	0	0	163	117	45	26
1	1	1	6	37.7505	0	0	4	0	1	4	0	0	176	94	49	25
1	1	0	9.5	36.7157	0	1	5	1	0	1	0	0	153	72	45	26
1	0	1	4.5	36.5712	0	0	3	1	0	1	0	0	133	64	36	27
1	1	1	2.85	31.9525	1	0	3	0	1	4	0	0	170	104	54	30
0	0	1	5.8	30.3214	0	0	3	0	1	4	0	0	180	101	37	22
0	0	1	3.74	30.0644	0	0	3	1	1	4	1	0	173	110	69	37
